# Supplementary material for: Elevated endoplasmic reticulum stress reinforced immunosuppression in the tumor microenvironment via myeloid-derived suppressor cells
Source: PubMed Central journal article supplement (PMC4322987; doi:10.18632/oncotarget.2589), 2014-12-02
Supplement: oncotarget-05-12331-s001.pdf [file oncotarget-05-12331-s001.pdf]

## SUPPLEMENTARY FIGURES

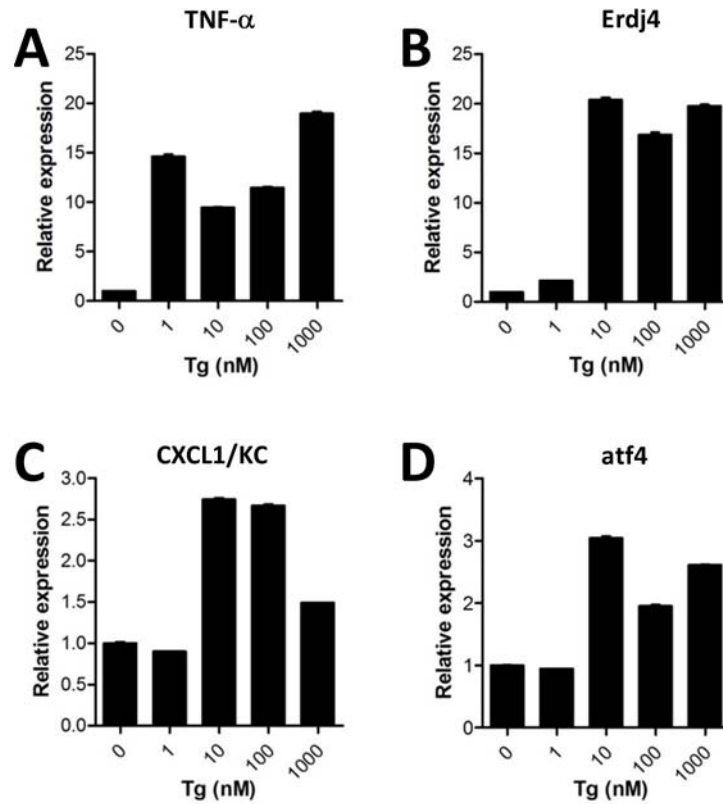

**Supplementary Figure S1: Tg-induced ER stress in HER2/CT26 cells.** HER2/CT26 cells were cultured with Tg for 24 h and mRNA levels of ER stress genes were measured by RT-qPCR. (A-D) mRNA levels of *TNF- $\alpha$* , *Erdj4*, *CXCL1*, and *atf4* in Tg-treated HER2/CT26 cells.

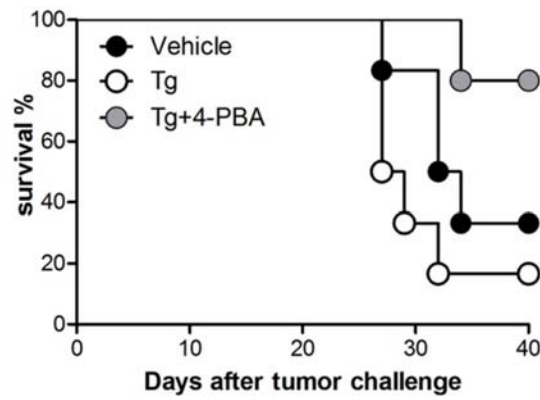

**Supplementary Figure S2: 4-PBA increased the survival of tumor-bearing mice caused by Tg treatment.** Daily treatments with 100  $\mu\text{g}/\text{kg}$  Tg or 10  $\text{mg}/\text{kg}$  4-PBA were initiated 2 weeks after *s.c.* injection of TC-1 tumor cells into C57BL/6 mice ( $n = 6$ ).

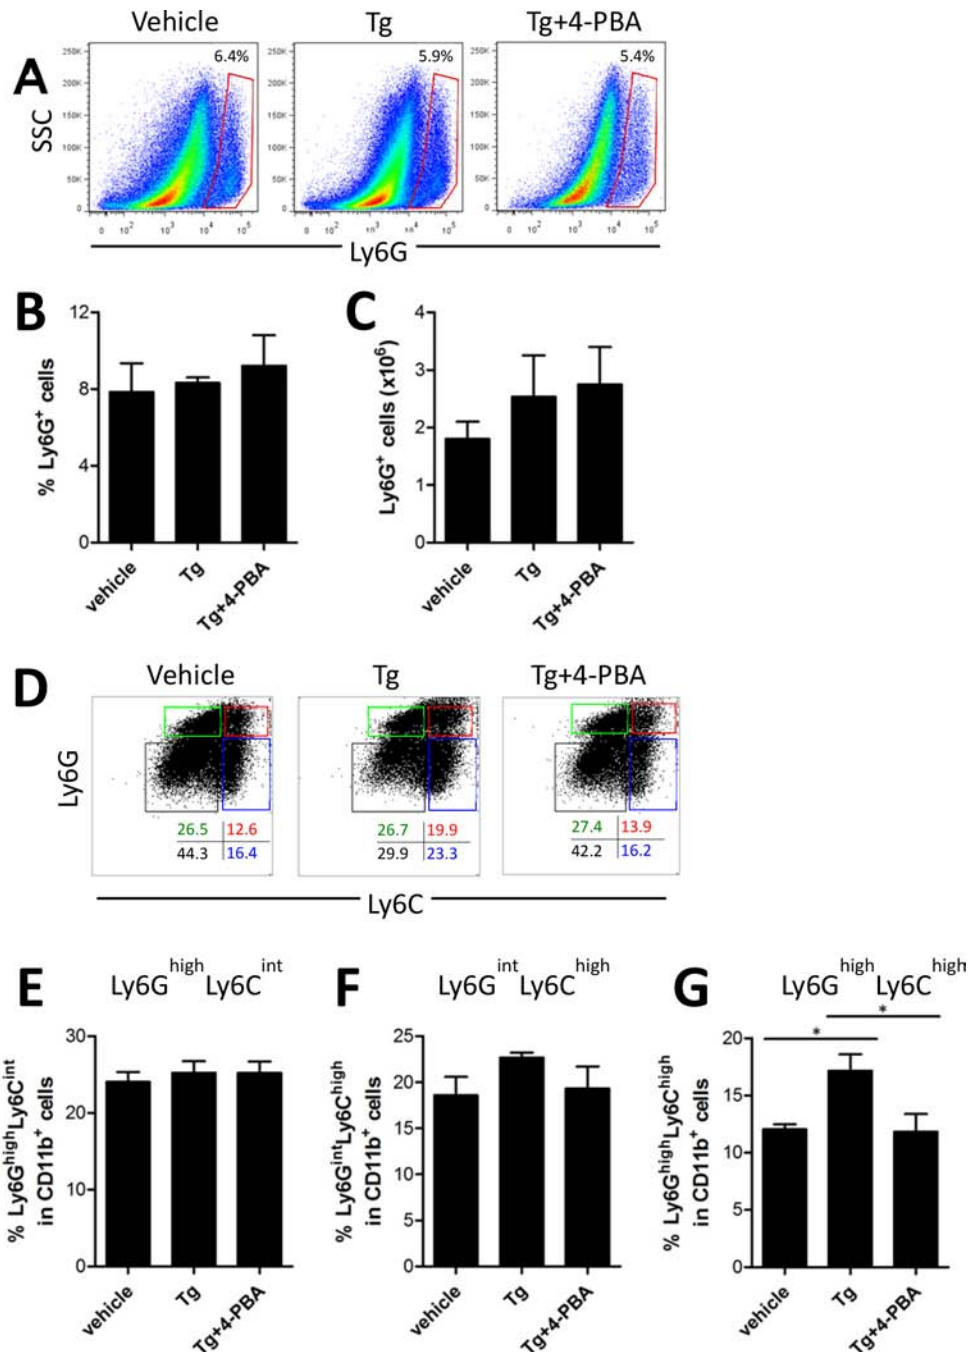

**Supplementary Figure S3: The populations of tumor-infiltrating MDSCs were not affected by ER stress.** BALB/c mice were injected *s.c.* with  $2 \times 10^5$  HER2/CT26 cells. At 4 weeks after tumor inoculation, MDSCs were isolated from tumor tissues and were assessed by flow cytometry. **(A)** tumor-infiltrating Ly6G<sup>+</sup> cells. **(B)** percentages, and **(C)** absolute number, of tumor-infiltrating Ly6G<sup>+</sup> cells ( $n = 3$ ). **(D)** Ly6G<sup>+</sup> and Ly6C<sup>+</sup> subsets among CD11b<sup>+</sup> MDSCs. **(E-G)** summary graph for sub-populations in CD11b<sup>+</sup> MDSCs ( $n = 3$ ). Graphs show mean  $\pm$  SEM. \* $p < 0.05$  using *Student's* *t*-test.

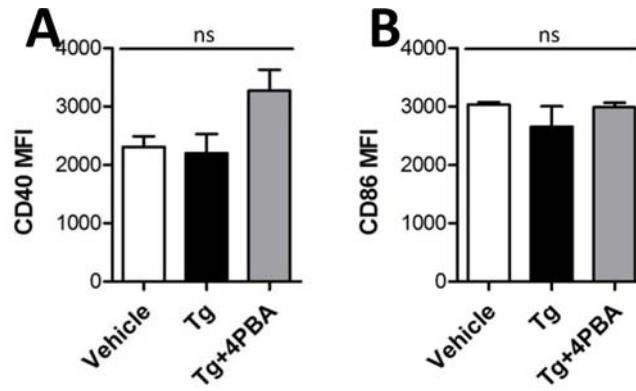

**Supplementary Figure S4: Surface expression of costimulatory molecules on tumor-infiltrating MDSCs.** (A-B) MDSCs were isolated from spleen tissues, and CD40 and CD86 expression was assessed by flow cytometry. ns, not significant.

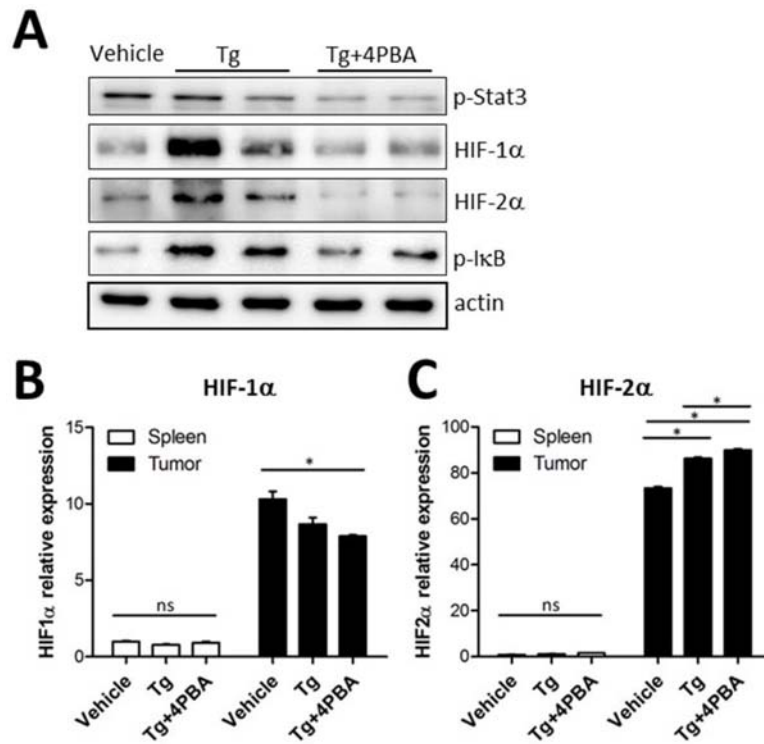

**Supplementary Figure S5: 4-PBA reduced HIF expression enhanced by Tg-mediated ER stress.** (A) Immunoblot of tumor-lysate from tumor-bearing mice treated with vehicle, Tg, and Tg with 4-PBA. (B-C) mRNA levels of *HIF-1α* and *HIF-2α* from spleen- or tumor-filtrating MDSCs. ns, not significant, \* $p < 0.05$  using one-way ANOVA.

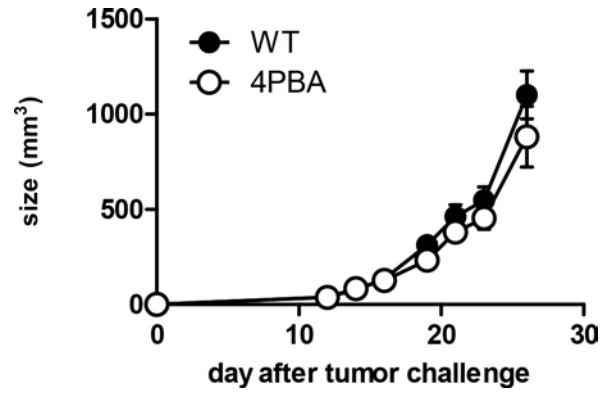

**Supplementary Figure S6: 4-PBA treatment alone did not decrease tumor growth.** BALB/c mice were injected *s.c.* with  $10^6$  HER2/CT26 cells. Daily treatments with 10 mg/kg 4-PBA were initiated 2 weeks after tumor inoculation.
